# Supplementary material
Source: publisher site journal article supplement (https://www.dovepress.com/article/217539)
Supplement: Supplementary file 1 [file get_supplementary_file.php]

**Population pharmacokinetic modeling of on-demand and surgical use of nonacog beta pegol (N9-GP) and rFIXFc based upon the paradigm 7 comparative pharmacokinetic study**

Mindy L Simpson1, Roshni Kulkarni2, Carmen Escuriola Ettingshausen3, Rikke Medom Meldgaard4, David L Cooper5, Robert Klamroth6

**Supplement materials**

**
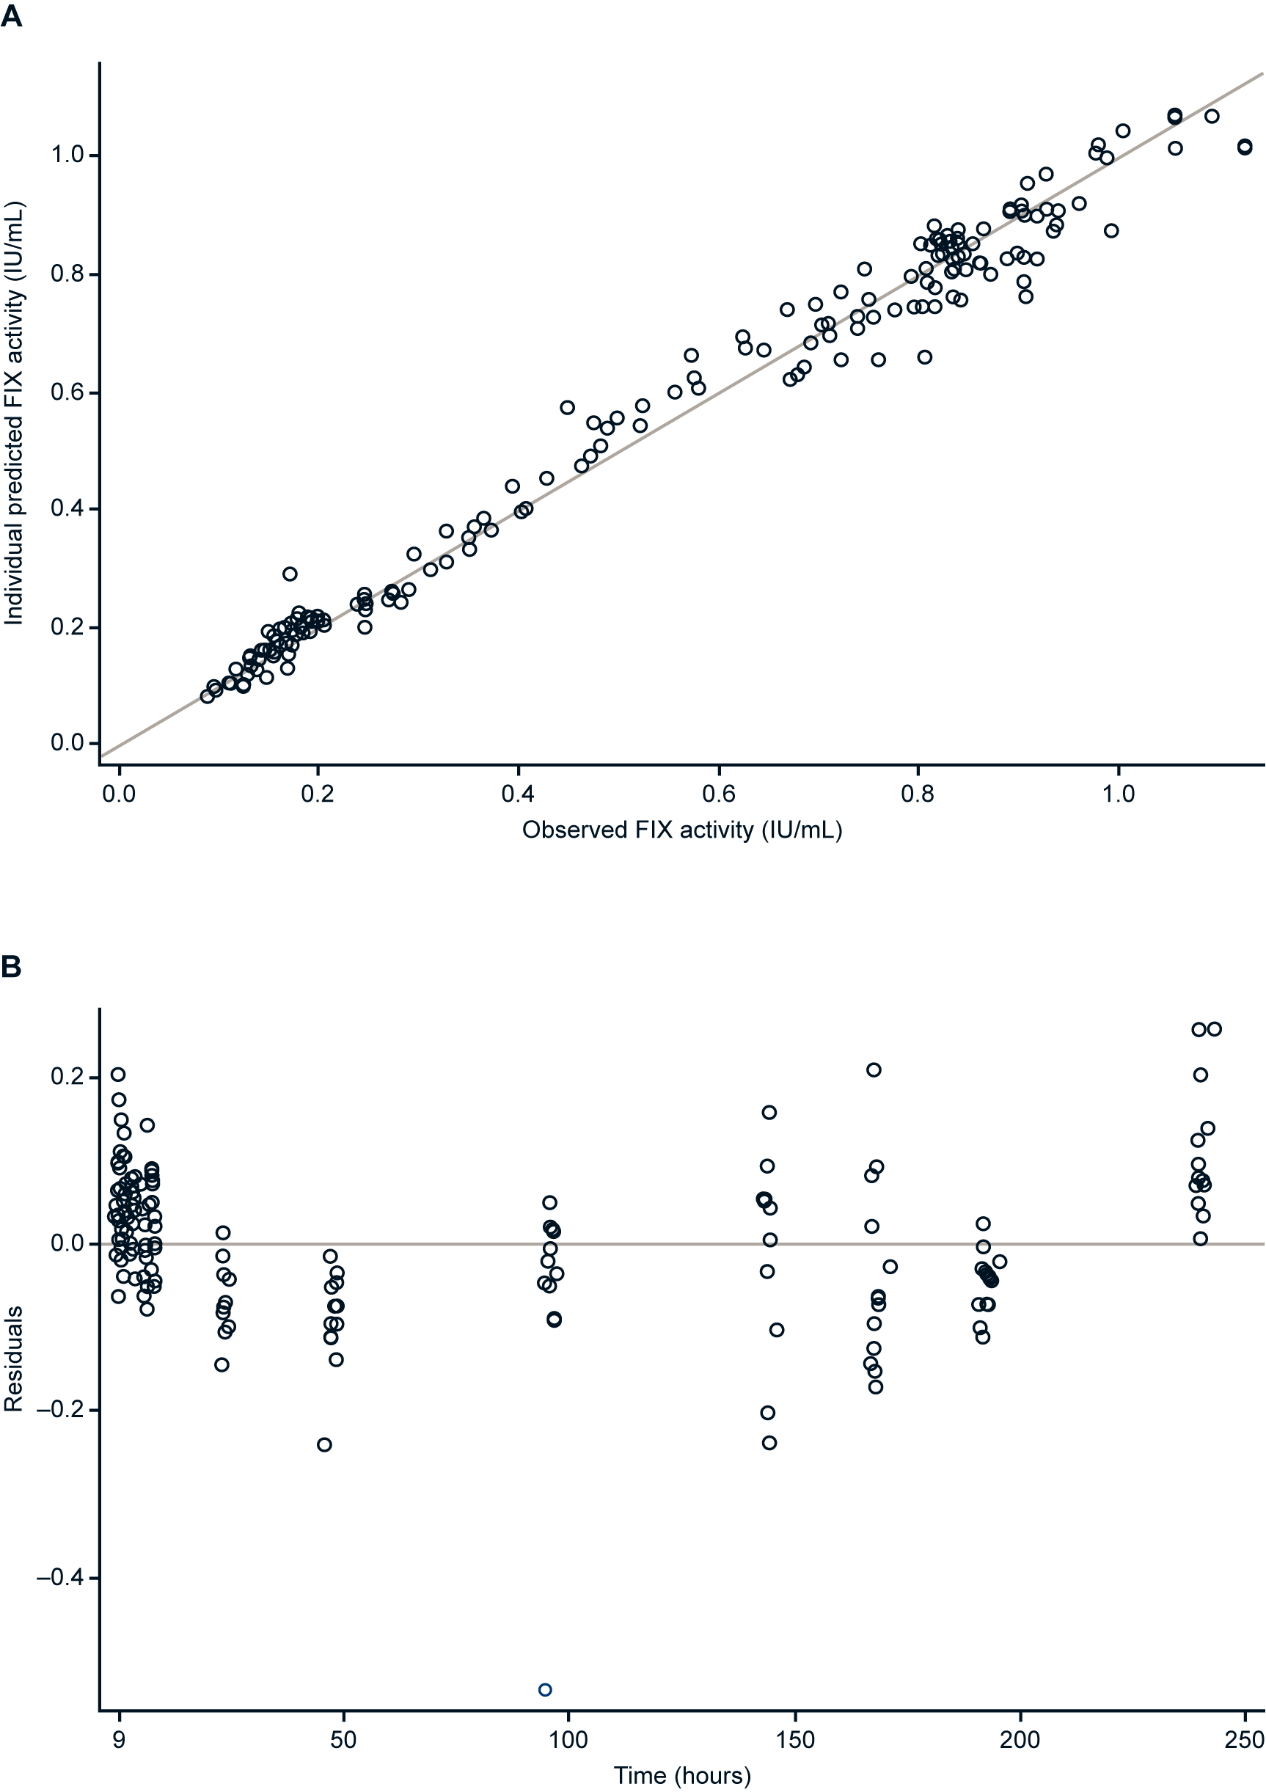
**

**
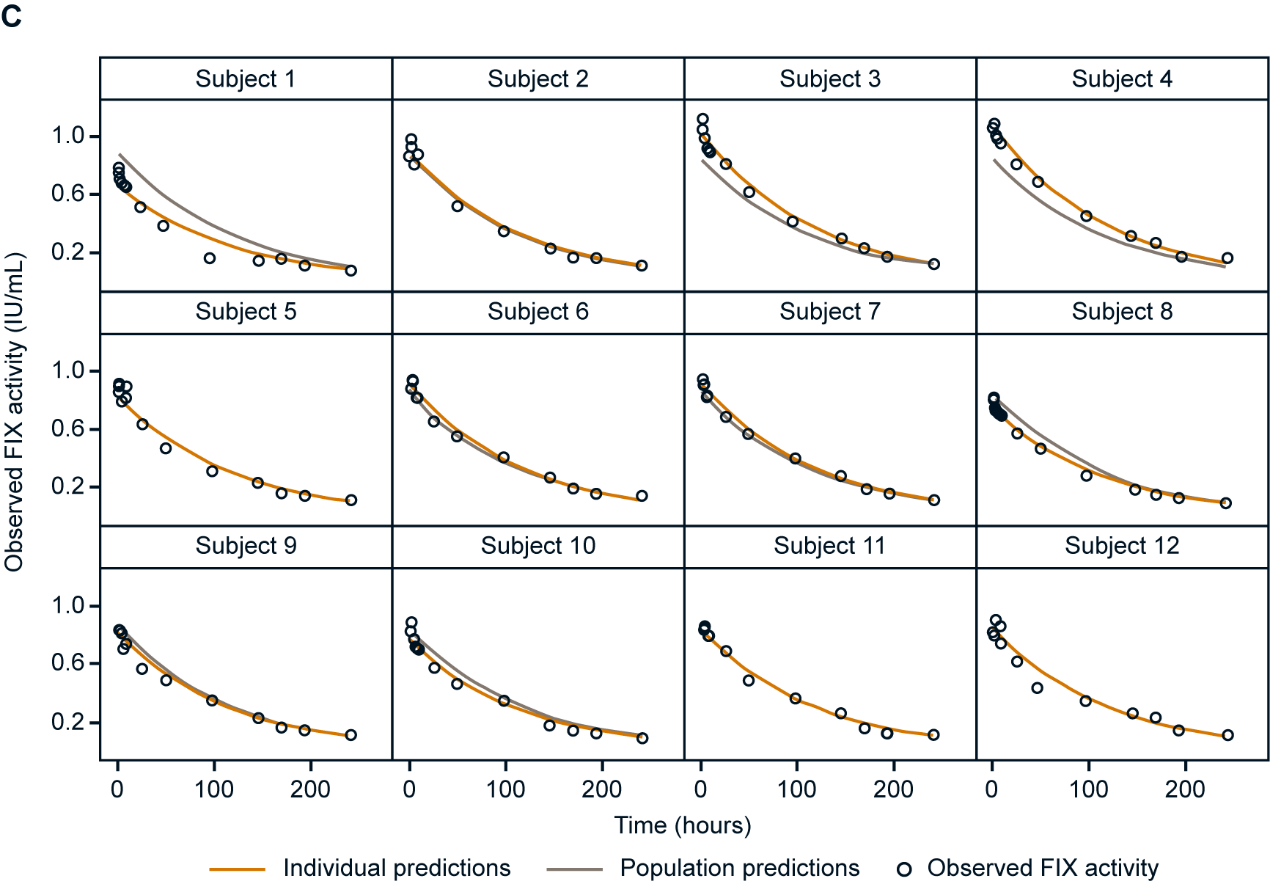
**

**Supplementary figure 1** Goodness of fit for **(A)** predicted FIX activity with N9-GP compared with observed activity in paradigm 7; **(B)** Residuals vs time with N9-GP in paradigm 7; **(C)** Individual vs population predictions of N9-GP compared with observed activity in paradigm 7.

**Abbreviation:** FIX, factor IX.

**
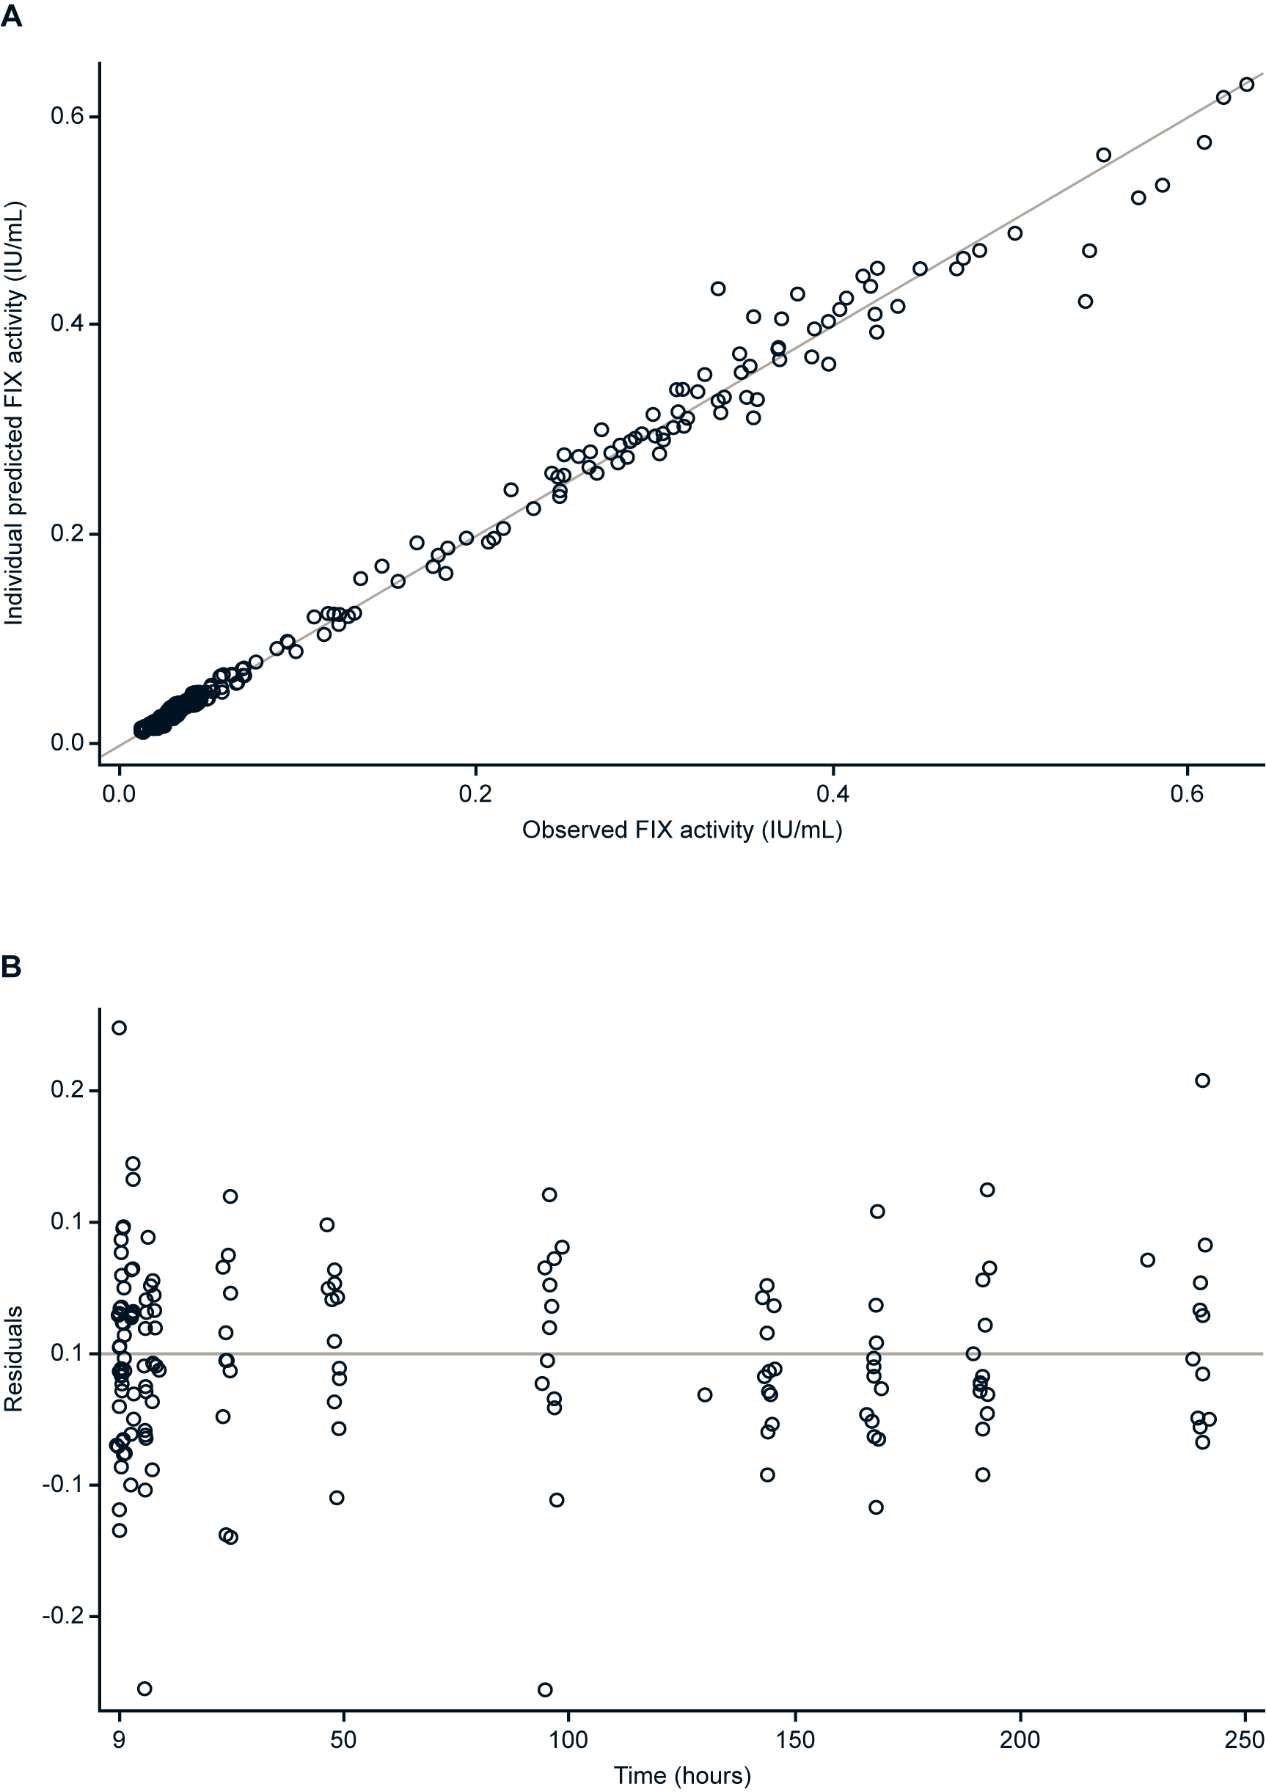
**

**
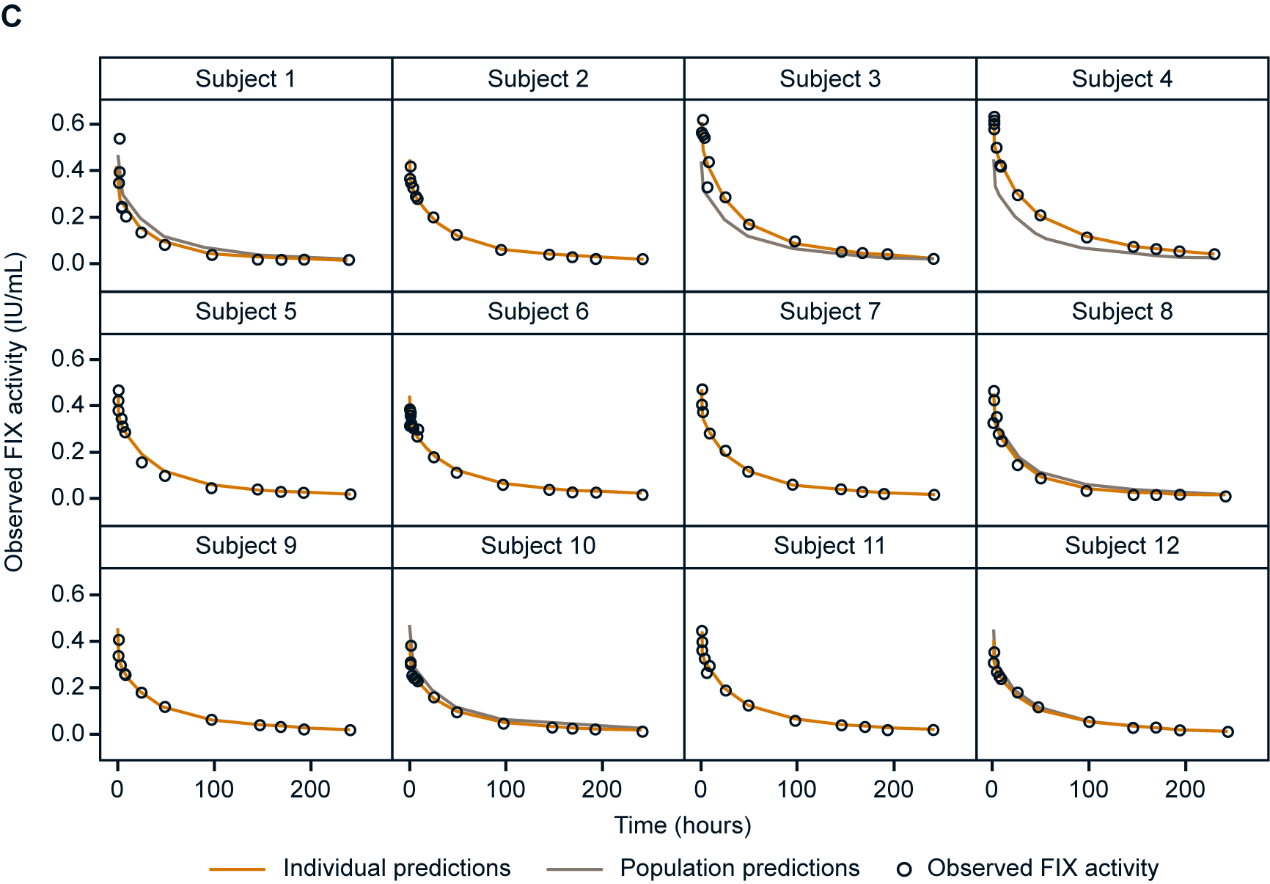
**

**Supplementary figure 2** Goodness of fit for **(A)** predicted FIX activity with rFIXFc compared with observed activity in paradigm 7; **(B)** residuals vs time with rFIXFc in paradigm 7; **(C)** individual vs population predictions of rFIXFc compared with observed activity in paradigm 7.

**Abbreviations:** FIX, factor IX; rFIXFc, recombinant FIX Fc fusion protein.

**
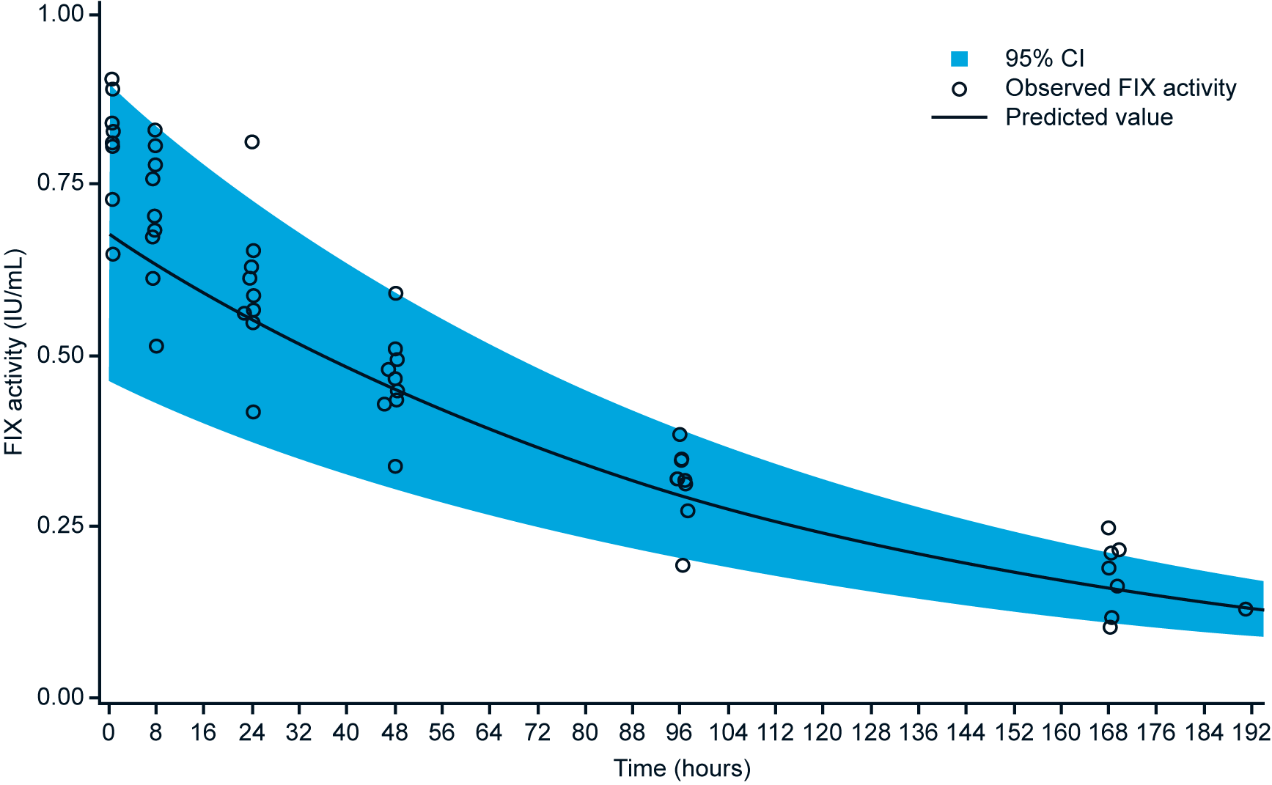
**

**Supplementary figure 3** Predictions of FIX activity with N9-GP compared with observed activity in paradigm 2.

**Abbreviation:** FIX, factor IX.

**
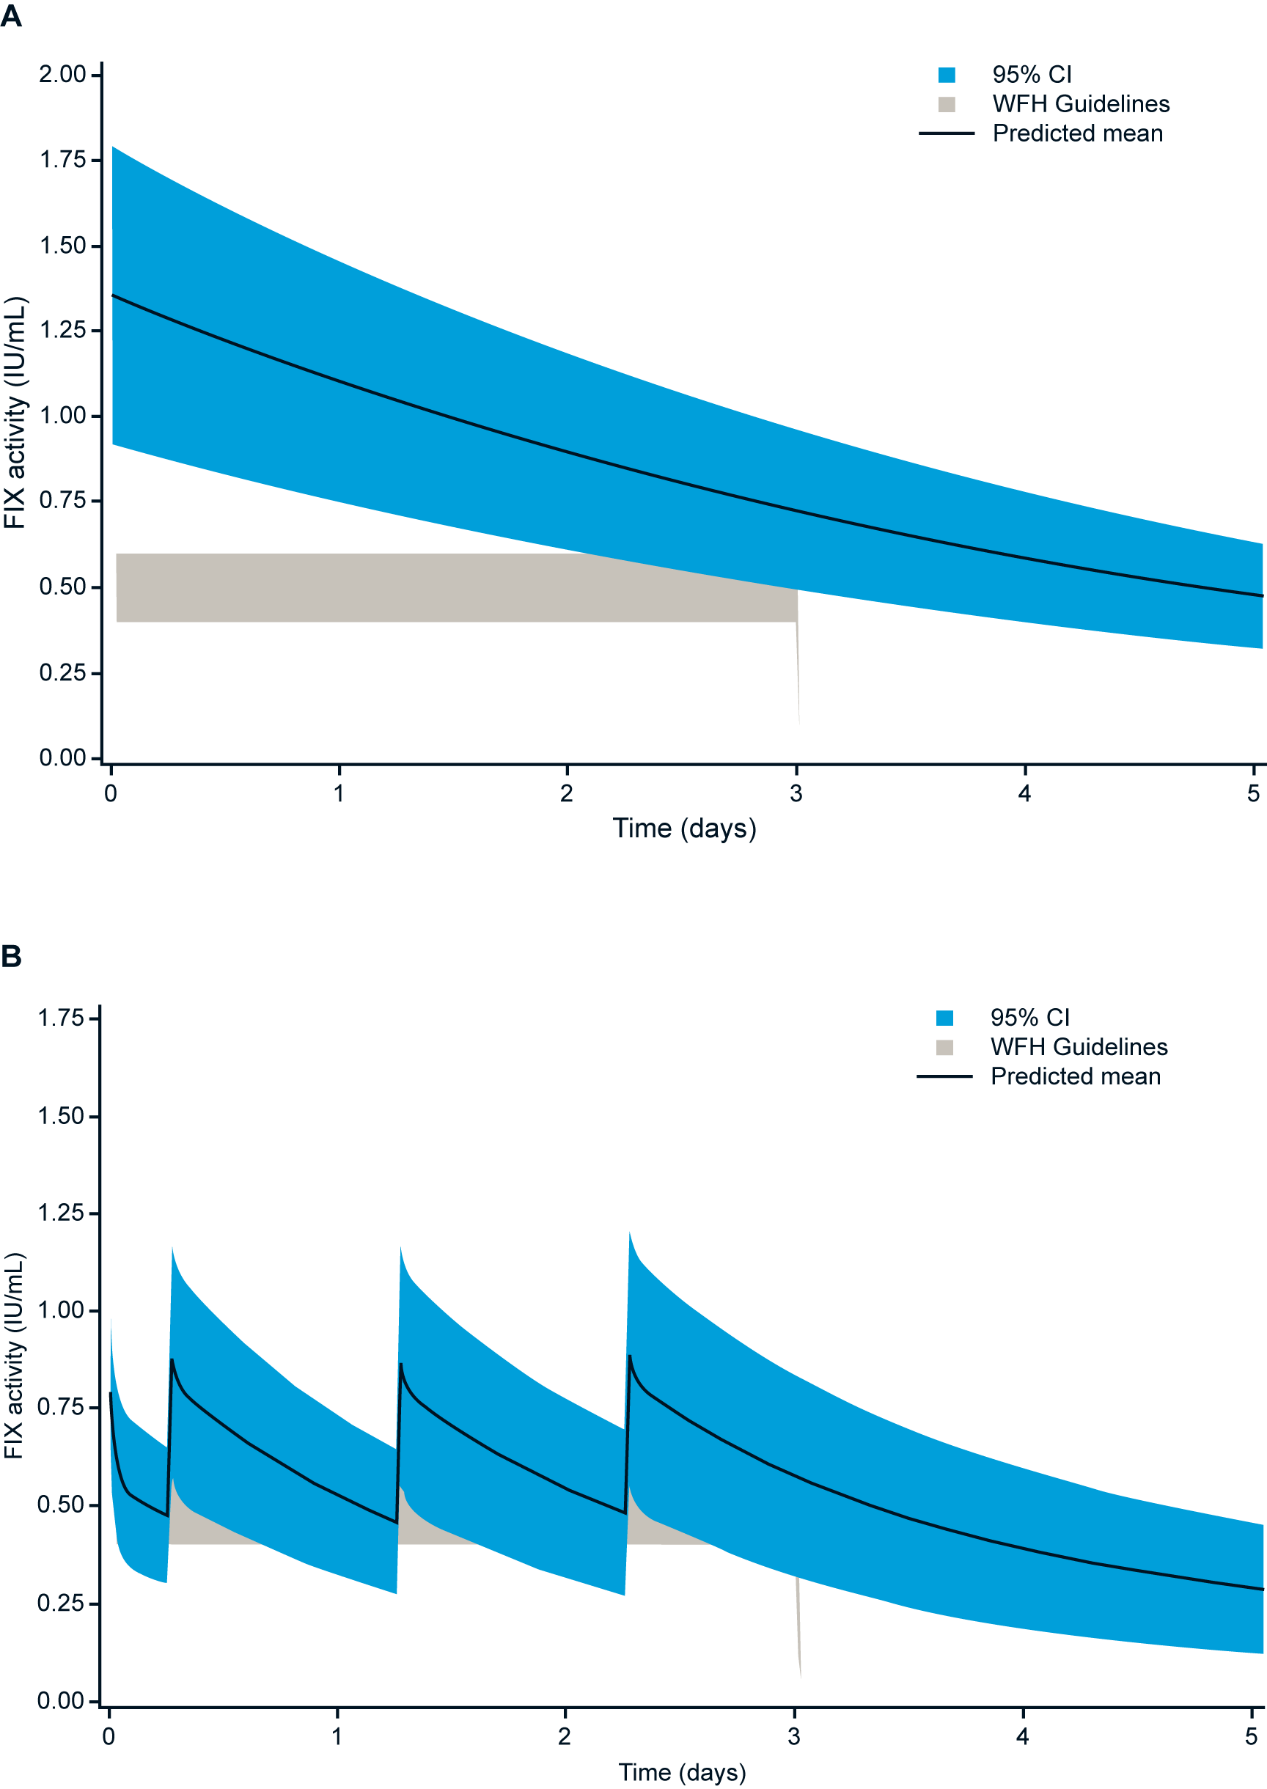
**

**Supplementary figure 4** Predicted means and confidence limits for simulated dosing for severe bleeds to achieve FIX activities meeting WFH guidelines2 for **(A)** N9-GP 80 IU/kg and for **(B)** rFIXFc 80 IU/kg followed by 50 IU/kg.

**Abbreviations:** FIX, factor IX; rFIXFc, recombinant FIX Fc fusion protein; WFH, World Federation of Hemophilia.


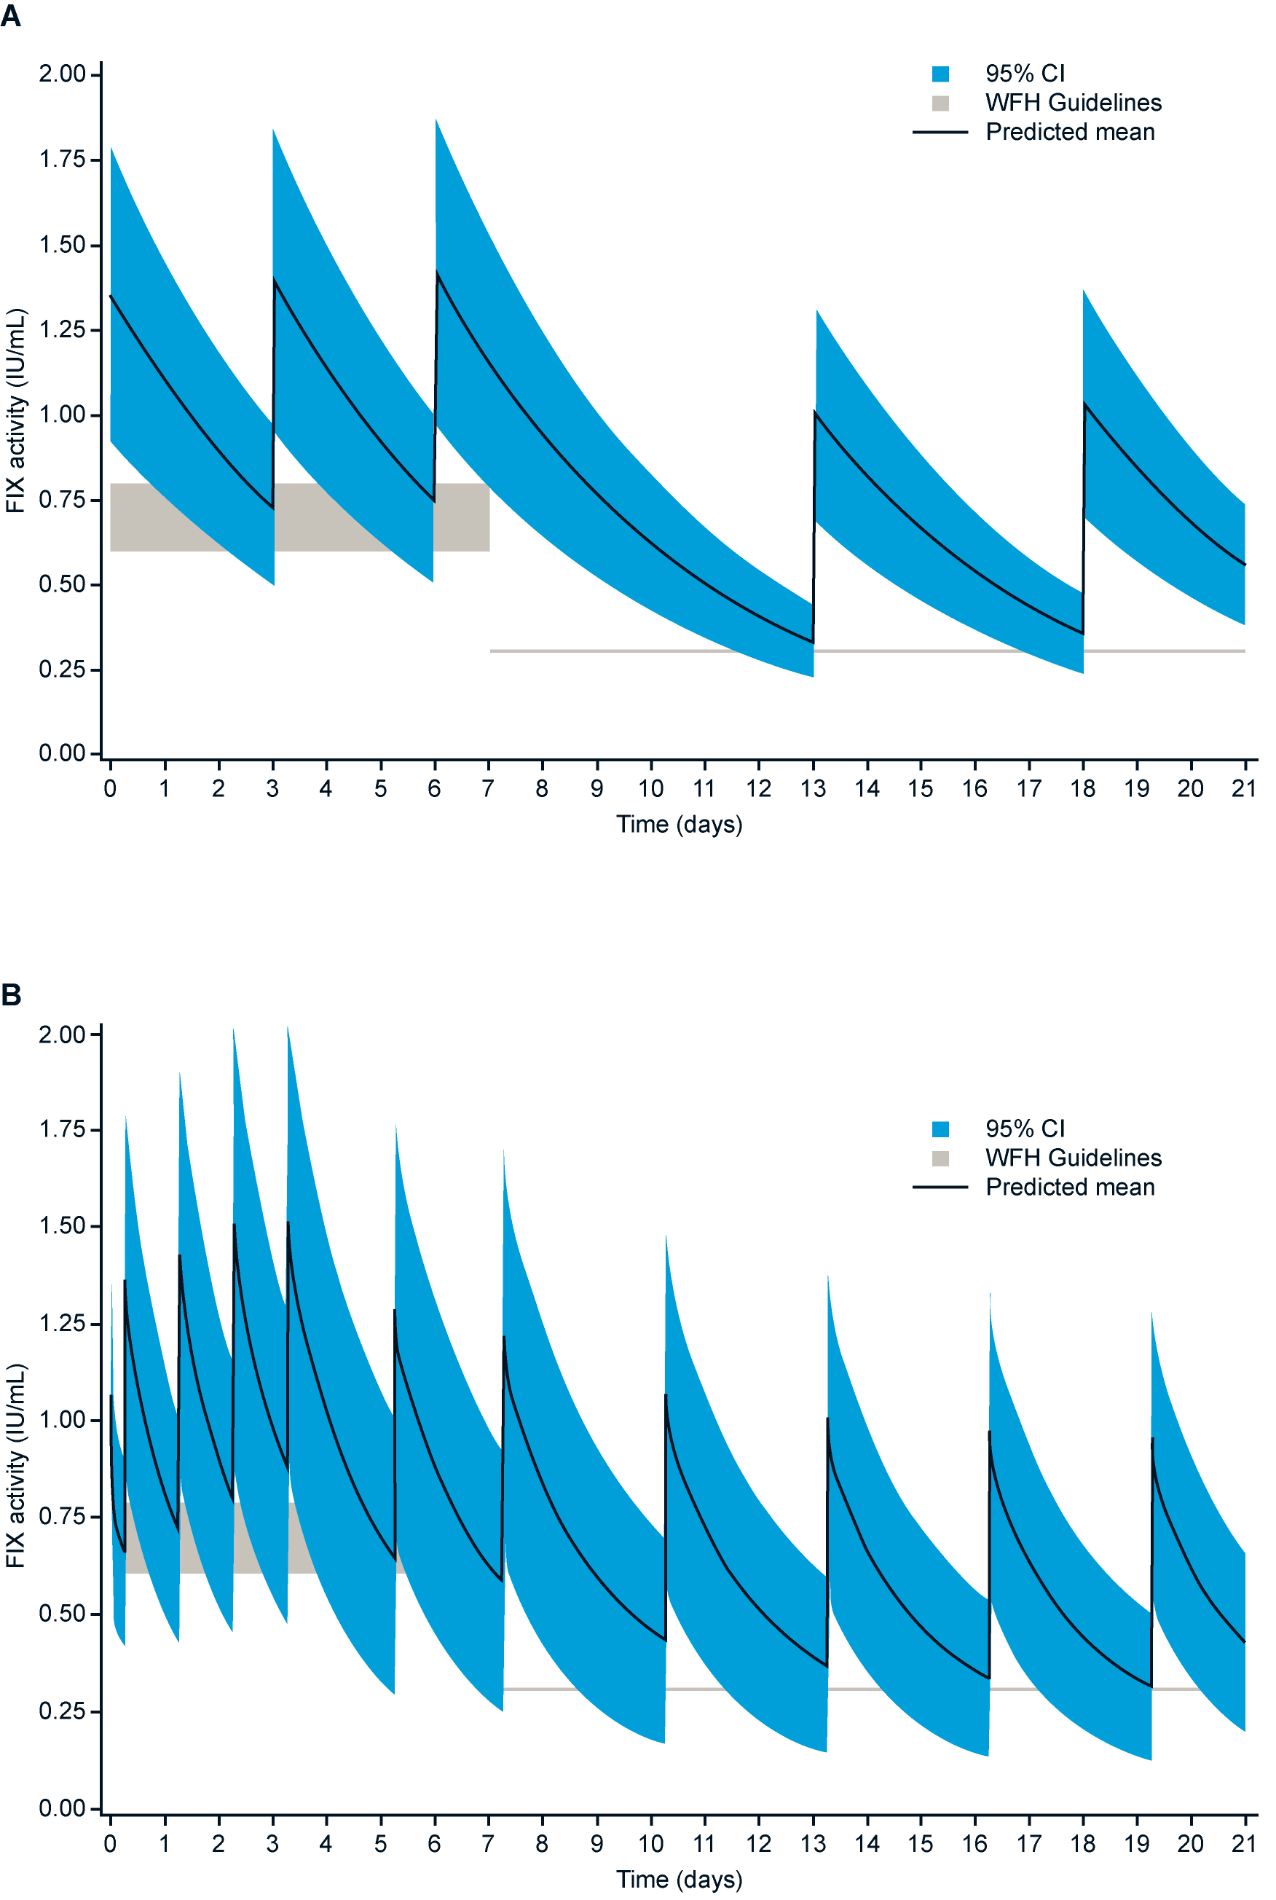


**Supplementary figure 5** Predicted means and confidence limits for simulated dosing for life-threatening bleed (N9-GP vs rFIXFc) to achieve FIX activities to meet WFH guidelines2 for **(A)** N9-GP 80 IU/kg followed by 40 IU/kg and **(B)** rFIXFc 110 IU/kg followed by three doses of 90 IU/kg and seven doses of 80 IU/kg.

**Abbreviations:** FIX, factor IX; rFIXFc, recombinant FIX Fc fusion protein; WFH, World Federation of Hemophilia.

**
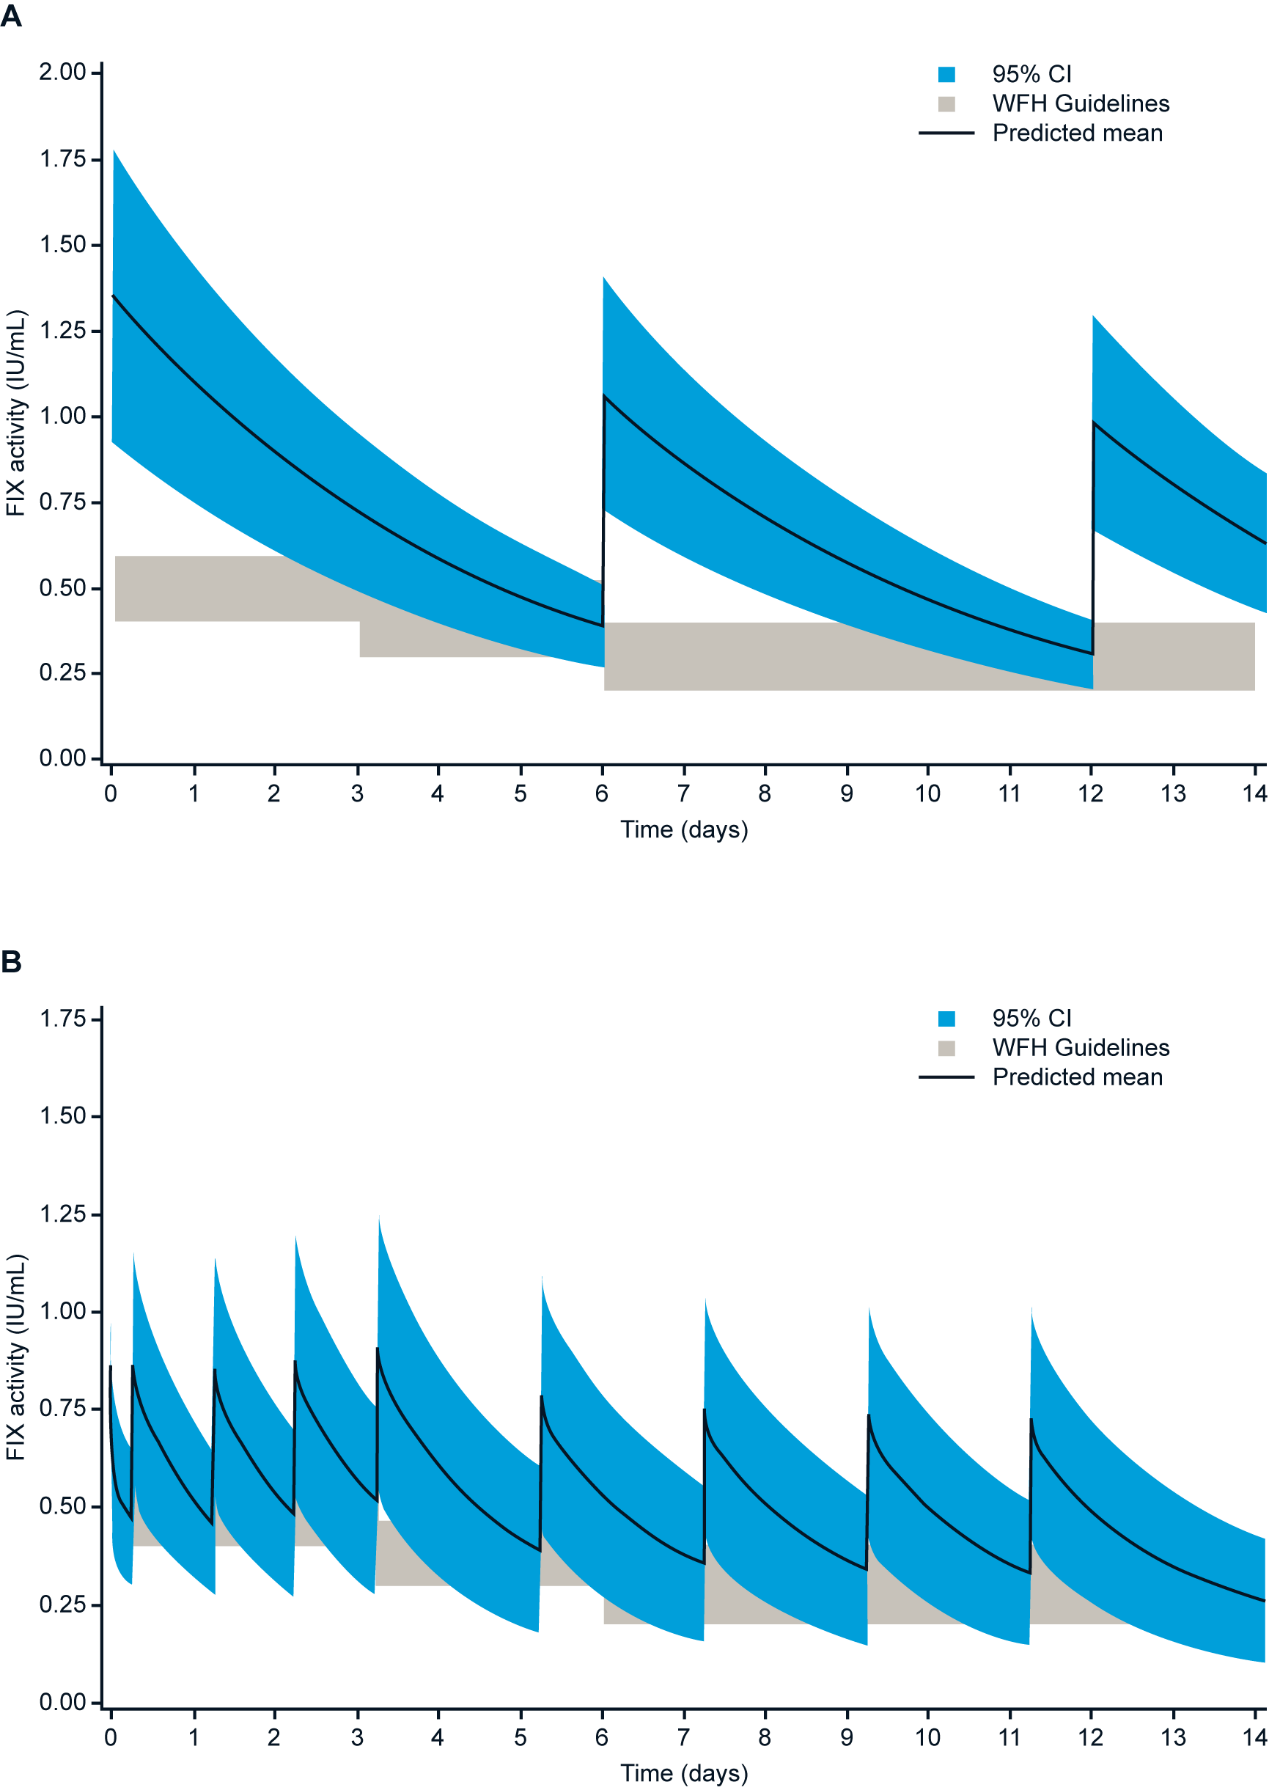
**

**Supplementary figure 6** Predicted means and confidence limits for simulated dosing for major surgery to achieve FIX activities meeting WFH guidelines2 for **(A)** N9-GP 80 IU/kg followed by 40 IU/kg and for **(B)** rFIXFc 80 IU/kg followed by 50 IU/kg.

**Abbreviations:** FIX, factor IX; rFIXFc, recombinant FIX Fc fusion protein; WFH, World Federation of Hemophilia.
